# Supplementary material
Source: PubMed Central journal article supplement (PMC3391587)
Supplement: NIHMS387929-supplement-01.pdf [file NIHMS387929-supplement-01.pdf]

**SUPPLEMENTAL TABLE 1. [<sup>18</sup>F]DPA-714 Uptake in Different Tissues (Last 30 min of Dynamic Scan)**

|                    | <b>%ID/cc<br/>(Brain)</b> | <b>%ID/cc<br/>(Tumor)</b> | <b>%ID/cc<br/>(Skull)</b> | <b>%ID/cc<br/>(Harderian<br/>Gland)</b> | <b>Ratio<br/>(Tumor/Brain)</b> |
|--------------------|---------------------------|---------------------------|---------------------------|-----------------------------------------|--------------------------------|
| <b>Mean (N=11)</b> | 0.088                     | 0.331                     | 0.301                     | 0.484                                   | 3.828                          |
| <b>SD (N=11)</b>   | 0.033                     | 0.109                     | 0.091                     | 0.177                                   | 0.645                          |

SUPPLEMENTAL FIGURE 1. Mean relative quantities of measured radiometabolites for [<sup>18</sup>F]DPA-714 from multiple dynamic PET studies in rats (*MEAN* ± SD).

SUPPLEMENTAL FIGURE 2. Time-activity curves (TACs) derived from nine 90-min dynamic studies with [<sup>18</sup>F]DPA-714 in C6 glioma bearing rats (*MEAN* ± SD).

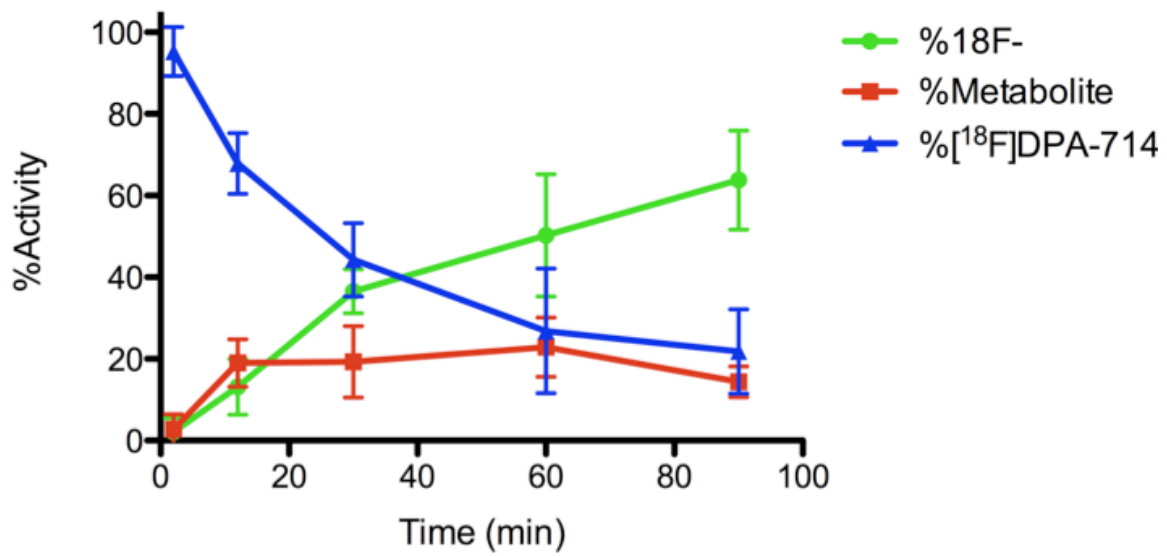

Supplemental Figure 1.

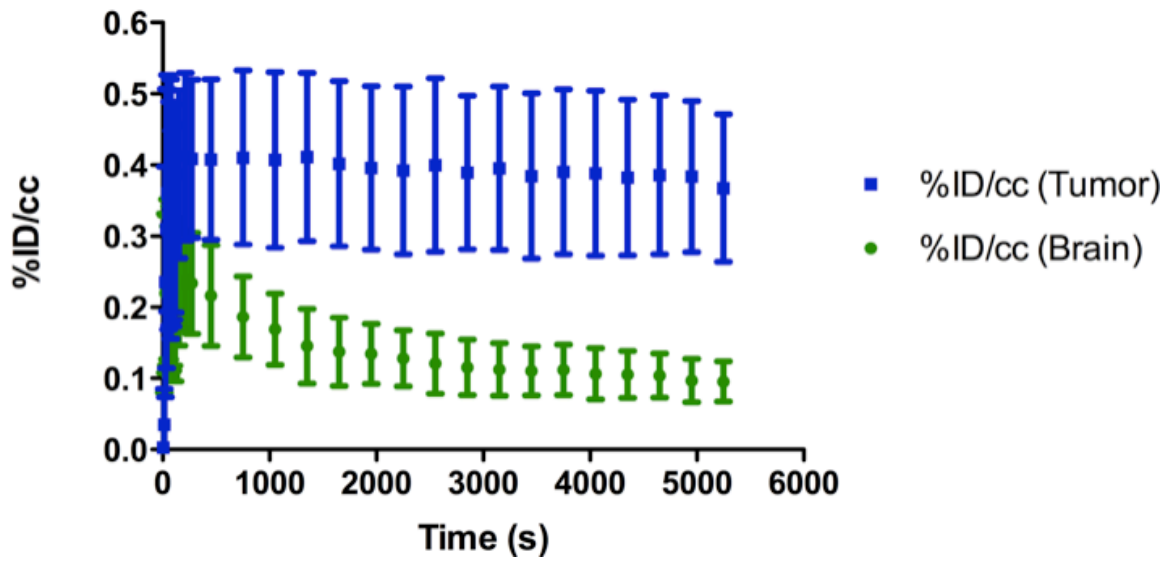

Supplemental Figure 2.
